# Supplementary material
Source: Springer Nature journal article supplement (https://www.springermedizin.de/resource/supplementary/12916_2010_369_MOESM1_ESM.pdf/9599806)

(a)

Pericontusional

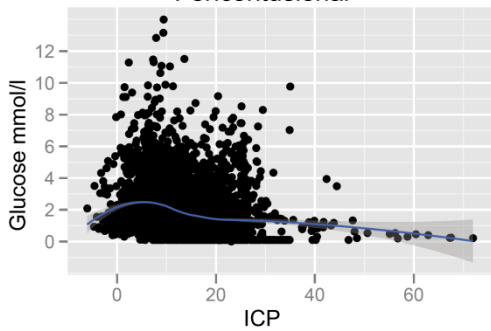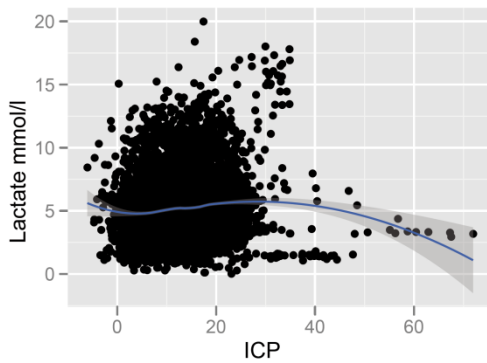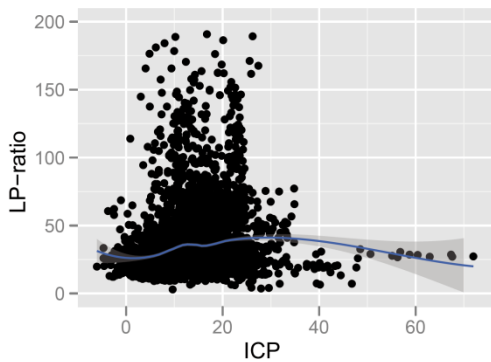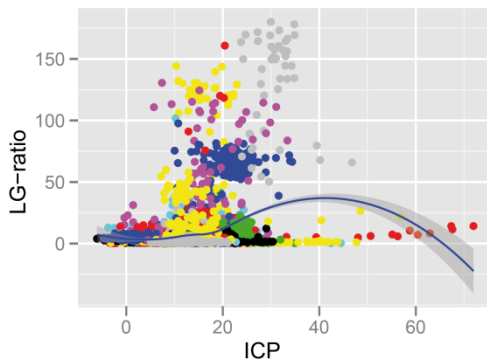

(b)

Non-Pericontusional

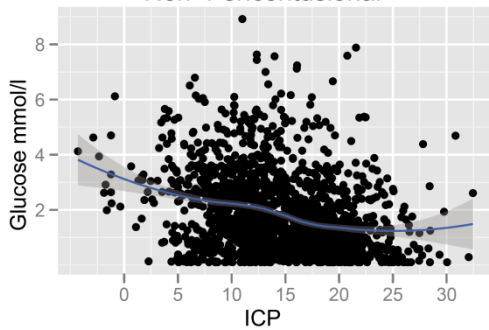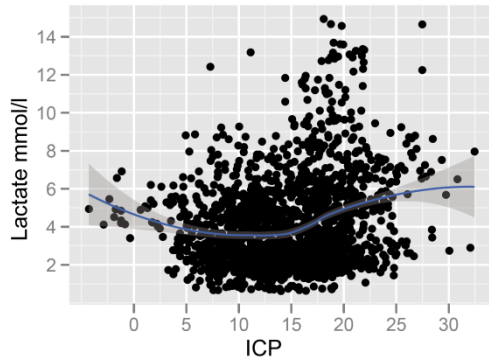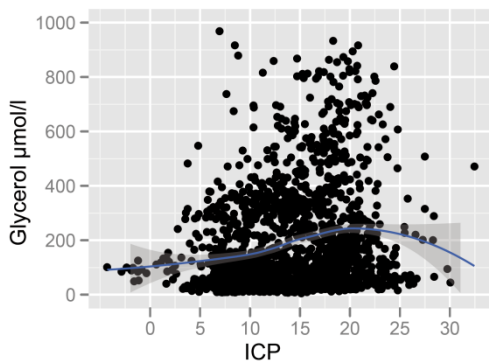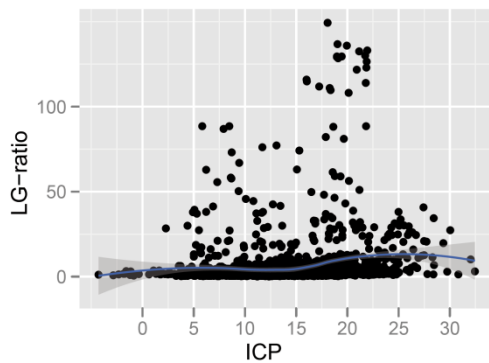

Supplement: MOESM1 [file 9599806]
